# Supplementary material for: A Herbal Composition of Semen Hoveniae, Radix Puerariae, and Fructus Schisandrae Shows Potent Protective Effects on Acute Alcoholic Intoxication in Rodent Models
Source: Hindawi journal article supplement (doi:10.1155/2012/638197), 2012-01-01
Supplement: f1 [file 638197.f1.pdf]

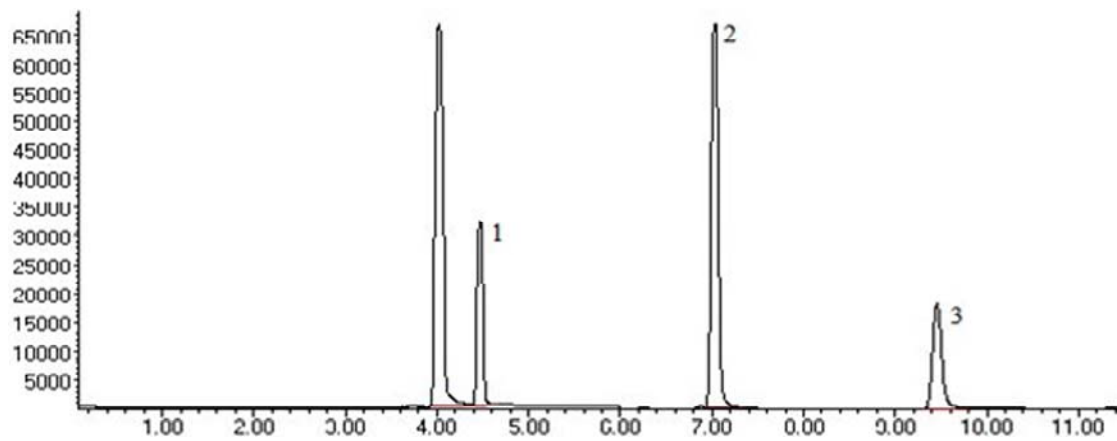

**Fig. 1** GC chromatogram of serum from inebriated rat. 1: Acetaldehyde; 2: Ethanol; 3: Amylene hydrate.

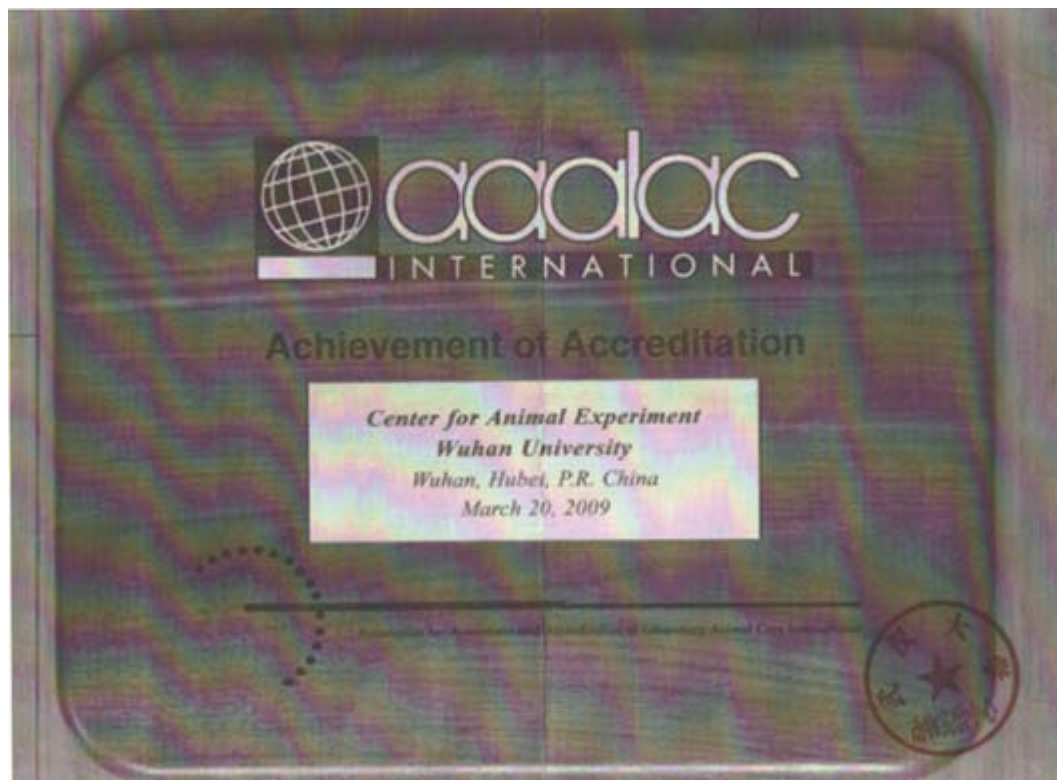

**Fig. 2** Evidence for the accreditation by Association for Assessment and Accreditation of Laboratory Animal Care International (AAALAC International).
